# Elevated N-glycosylation of immunoglobulin G variable regions in myasthenia gravis highlights a commonality across autoantibody-associated diseases

**Running title:** IgG Fab glycosylation in human autoimmune disease

**Authors:** Caleigh Mandel-Brehm<sup>1\*</sup>, Miriam L. Fichtner<sup>2,3\*</sup>, Ruoyi Jiang<sup>3\*</sup>, Valerie J. Winton<sup>4</sup>, Sara E. Vazquez<sup>1</sup>, Minh C. Pham<sup>3</sup>, Kenneth B. Hoehn<sup>5</sup>, Neil L. Kelleher<sup>6</sup>, Richard J. Nowak<sup>2</sup>, Steven H. Kleinstein<sup>3,5,7</sup>, Michael R. Wilson<sup>8</sup>, Joseph L. DeRisi<sup>1\*\*</sup> and Kevin C. O'Connor<sup>2,3\*\*</sup>

## **Affiliations:**

1. Department of Biochemistry and Biophysics, University of California San Francisco, San Francisco, CA, USA
2. Department of Neurology, Yale University School of Medicine, New Haven, CT, USA
3. Department of Immunobiology, Yale University School of Medicine, New Haven, CT, USA
4. Proteomics Center of Excellence, Northwestern University, Evanston, IL, USA
5. Department of Pathology, Yale University School of Medicine, New Haven, CT
6. Departments of Chemistry, and Molecular Biosciences, the Chemistry of Life Processes Institute, and the Proteomics Center of Excellence at Northwestern University, Evanston, IL, USA
7. Interdepartmental Program in Computational Biology and Bioinformatics, Yale University School of Medicine, New Haven, CT, USA
8. Weill Institute for Neurosciences, Department of Neurology, University of California San Francisco, San Francisco, CA, USA

\* CMB, MLF and RJ contributed equally as first authors.

\*\* JLD and KCO contributed equally as senior authors.

## **Corresponding author:**

Kevin C. O'Connor, Ph.D.  
Departments of Neurology and Immunobiology  
Yale University School of Medicine  
Phone 203-737-3321  
Email [kevin.oconnor@yale.edu](mailto:kevin.oconnor@yale.edu)

1 **Abstract**

2 Elevated N-linked glycosylation of immunoglobulin G variable regions (IgG-V<sup>N-Glyc</sup>) is an  
3 emerging molecular phenotype associated with autoimmune disorders. To test the broader  
4 specificity of elevated IgG-V<sup>N-Glyc</sup>, we studied patients with distinct subtypes of myasthenia  
5 gravis (MG), a B cell-mediated autoimmune disease. Our experimental design included  
6 adaptive immune receptor repertoire sequencing to quantify and characterize N-glycosylation  
7 sites in the global B cell receptor repertoire, proteomics to examine glycosylation patterns of  
8 the circulating IgG, and production of human-derived recombinant autoantibodies, which  
9 were studied with mass spectrometry and antigen binding assays to confirm occupation of  
10 glycosylation sites and determine whether they alter binding. We found that the frequency of  
11 IgG-V<sup>N-Glyc</sup> motifs was increased in the B cell repertoire of MG patients when compared to  
12 healthy donors. Motifs were introduced by both biased V gene segment usage and somatic  
13 hypermutation. IgG-V<sup>N-Glyc</sup> could be observed in the circulating IgG in a subset of MG  
14 patients. Autoantigen binding, by patient-derived MG autoantigen-specific monoclonal  
15 antibodies with experimentally confirmed presence of IgG-V<sup>N-Glyc</sup>, was not altered by the  
16 glycosylation. Our findings extend prior work on patterns of variable region N-linked  
17 glycosylation in autoimmunity to MG subtypes. Although occupied IgG-V<sup>N-Glyc</sup> motifs are  
18 found on MG autoantigen-specific monoclonal antibodies, they are not required for binding to  
19 the autoantigen in this disease.

## 20 Introduction

21 The vast diversity of immunoglobulin G variable regions (IgG-V) is critical for host immunity.  
22 This diversity arises through VDJ recombination and somatic hypermutation (SHM).  
23 Historically, IgG-V diversity has been represented by amino acid sequence alone with little  
24 focus on post-translational modifications. Recently, the presence of N-linked glycosylation in  
25 IgG-V (IgG-V<sup>N-Glyc</sup>) has been shown to contribute to diversity (1, 2). IgG-V<sup>N-Glyc</sup> is contingent  
26 upon the presence of the predictive N-Glyc amino acid motif N-X-S/T, where X can be any  
27 amino acid except for proline. This motif is most often introduced as a consequence of SHM  
28 (3). Less often it can be provided by the few germline gene segments (IGHV1-8, IGHV4-34,  
29 IGHV5-10-1, IGLV3-12, and IGLV5-37) in which it is encoded (4).

30

31 The percentage of IgG in healthy individuals that includes V-region glycosylation is  
32 approximately 15-25%; the range reflects different approaches of measurement (1). The  
33 occurrence of IgG-V<sup>N-Glyc</sup> also varies among the IgG subclasses, with skewing toward higher  
34 frequencies in antibodies of the IgG4 subclass (5). Higher frequencies of IgG-V<sup>N-Glyc</sup> than that  
35 which is found in healthy individuals have been observed in B cell malignancies (6-10) and in  
36 autoimmune diseases (11). Specifically, increased frequencies have been reported for  
37 ANCA-associated vasculitis (AAV) (12-14), rheumatoid arthritis (RA) (15-18), and primary  
38 Sjogren's syndrome (pSS) (19, 20). The *in vivo* function of glycosylation in the IgG-V, a  
39 critical region of antigen contact, is not thoroughly understood. Follicular lymphomas may  
40 leverage N-glycosylation of their B cell receptors to activate antigen-independent signaling  
41 pathways that support survival (21). Antigen binding can also be influenced by IgG-V<sup>N-Glyc</sup>;  
42 this includes both increases and decreases in affinity and modulated functional activity. This  
43 is well highlighted by anti-citrullinated protein autoantibodies found in RA patients, where 80-  
44 100% of the autoantibodies include IgG-V<sup>N-Glyc</sup>, and binding is consequently altered (5, 16,  
45 17).

46

47 Myasthenia gravis (MG) is an autoimmune disorder affecting neuromuscular transmission.  
48 MG patients experience severe muscle weakness and increased fatigability (22, 23). The  
49 molecular immunopathology of MG is directly attributed to the presence of circulating IgG  
50 isotype autoantibodies specifically targeting extracellular domains of postsynaptic membrane  
51 proteins at the neuromuscular junction (NMJ) (23, 24). The most common subtype of  
52 autoantibody-mediated MG (approximately 85% of patients) is characterized by  
53 autoantibodies against the nicotinic acetylcholine receptor (AChR) (23). In many of the  
54 remaining patients, autoantibodies targeting the muscle-specific kinase (MuSK) are present  
55 (25, 26). While both anti-AChR and anti-MuSK antibodies cause disease, the underlying  
56 immune pathophysiology of these two MG subtypes is distinct (27). AChR MG is governed  
57 primarily by IgG1 subclass autoantibodies that facilitate pathology through blocking  
58 acetylcholine, activating complement-mediated damage and initiating internalization of  
59 AChRs (28-31). Conversely, the MuSK MG subtype is most often associated with IgG4  
60 subclass autoantibodies, which are incapable of activating complement, but rather mediate  
61 pathology through blocking MuSK binding partners and its kinase activity (32-34).

62

63 Given that IgG isotype autoantibodies directly facilitate MG pathology and that their divergent  
64 autoimmune mechanisms include different IgG subclasses (IgG1 and IgG4) known to include  
65 varying frequencies of IgG-V<sup>N-Glyc</sup>, we hypothesized that N-linked glycosylation might be  
66 differentially elevated in these two distinct MG subtypes. To that end we applied  
67 complementary sequencing and proteomic-based approaches to investigate IgG-V<sup>N-Glyc</sup>  
68 patterns in AChR and MuSK MG. Nucleotide-level sequencing was used to test for elevated  
69 IgG-V<sup>N-Glyc</sup> frequency in MuSK and AChR MG B cell receptor repertoires. Antibodies from  
70 sera were then evaluated with proteomic approaches to determine whether elevated IgG-V<sup>N-</sup>  
71 Glyc could be observed in the circulation. Finally, we tested whether N-linked glycans impact

72 binding to pathogenic targets by using patient-derived monoclonal autoantibodies with N-  
73 linked glycan occupancy validated by mass spectrometry. We show that IgG-V<sup>N-Glyc</sup> are more  
74 frequent in both AChR and MuSK MG in comparison to healthy controls and that the patterns  
75 differ between the two MG subtypes. However, the presence of IgG-V<sup>N-Glyc</sup> does not interrupt  
76 the binding of the pathogenic autoantibodies to their target antigens.

77

## 78 **Results**

79 *The frequency of IgG-V<sup>N-glyc</sup> is elevated in the B cell repertoire of patients with MG.*

80 N-linked glycosylation sites only occur at amino acid sequence positions with the motif (N-X-  
81 S/T, where X = not proline). Elevated IgG-V<sup>N-Glyc</sup> in MG could arise from the introduction of  
82 these sites by SHM or the use of germline sites found in a small subset of VH gene  
83 segments (IGHV1-8, IGHV4-34 and IGHV5-10). To quantify global differences in the  
84 glycosylation frequency of the B cell repertoire, we examined the encoded B cell receptor  
85 repertoire generated by adaptive immune receptor repertoire sequencing (AIRR-seq) from  
86 the mRNA of circulating PBMCs from healthy donors (HD) and MG patients (**Table S1**). The  
87 MuSK MG patient cohort (N=3) included 12 unique timepoint samples, the AChR (N=10)  
88 included 10 unique timepoint samples, and each HD (N=9) included a single time point. The  
89 AIRR-seq library included a total of 10,565,778 (heavy chain only) raw reads; after quality  
90 control and processing, a high-fidelity data set was generated that consisted of 764,644  
91 unique error-corrected sequences, which was further filtered to include only IgG subclass  
92 sequences that consisted of 232,094 sequences.

93

94 We observed a statistically significant elevation in median IgG-V<sup>N-Glyc</sup> site frequency for AChR  
95 MG (13.0%; P=0.039, one-tailed Wilcoxon test) and MuSK MG (17.4%, P=0.018, one-tailed  
96 Wilcoxon test) in comparison to healthy controls (10.3%) (**Figure 1A**). To investigate if the

97 increased frequency of N-linked glycosylation sites was generated through preferred use of  
98 the three VH-gene segments that encode an N-X-S/T motif or through SHM, we assessed  
99 the frequency of the motif in germline reversion of the VH-gene segments (**Figure 1B**). We  
100 observed no differences in the germline frequency of IgG-V<sup>N-Glyc</sup> sites when comparing  
101 healthy and AChR MG patients (P=0.55, one-tailed Wilcoxon test), while the MuSK MG  
102 cohort exhibited a significant difference (P=0.05, one-tailed Wilcoxon test), thus reflecting  
103 increases in the usage of select V gene segments (IGHV1-8, IGHV4-34, IGHV5-10-1). An  
104 illustrative example of N-X-S/T motif acquisition and conservation through the SHM process  
105 is shown for a B cell clonal family present in a MuSK MG repertoire, which includes  
106 acquisition of two motifs (**Figure S1**).

107

108 We then examined if differences in glycosylation frequency were specific to complementarity-  
109 determining (CDR) regions, which are primarily responsible for antigen contact, or also  
110 included distribution in the framework regions (FWR), which maintain structural integrity of  
111 the variable domains. The motif could be found in all CDRs and FWRs in sequences from the  
112 HDs and MG patients with the exception of FWR2, in which the motif was absent in all  
113 sequences (**Figure S2A**). The motif was most often observed in the FWR3 sequences from  
114 the HDs and MG patients. Sequences from the AChR MG patients revealed a significant  
115 difference in motif frequency only in the CDR2 region in comparison to HD (P=0.047, one-  
116 tailed Wilcoxon-test). Elevated frequencies were observed in comparisons of MuSK MG and  
117 HDs at all regions (**Figure S2A**), and statistically significant differences were observed in the  
118 FWR1, CDR2, and FWR4 regions (P=0.009, P=0.0045, P=0.042, respectively - one-tailed  
119 Wilcoxon tests). Examining the location of the motifs within each region (**Figure S2B**)  
120 showed that they were present throughout, but were not uniformly distributed, as some areas  
121 showed enriched accumulation. Those present in FWR1 and FWR4, although rare, were  
122 found close to the CDRs that they neighbor, CDR1 and CDR3 respectively (**Figure S2B**).

123 In summary, the frequency of variable region N-linked glycosylation sites among IgG  
124 switched B cells differ when comparing healthy controls and AChR or MuSK MG patients.  
125 These differences result from SHM in AChR MG, while differences found in MuSK MG result  
126 from both SHM and elevated usage of V genes with germline encoded N-linked glycosylation  
127 sites.

128

129 *Proteomic analysis demonstrates elevated IgG-V<sup>N-glyc</sup> in MG.*

130 Serum-derived IgG heavy chains associated with human autoimmunity, such as those in RA  
131 and ANCA-associated vasculitis, migrate at a higher molecular weight (MW) than those of  
132 healthy controls due to the presence of IgG-V<sup>N-Glyc</sup> (14, 16). Having demonstrated that the B  
133 cell repertoire of both AChR and MuSK MG include elevated IgG-V<sup>N-Glyc</sup> site frequency, we  
134 next sought to investigate if circulating IgG from patients with MG reflected this MW increase.  
135 To that end, we analyzed IgG purified from serum samples from the MG cohort (MuSK MG,  
136 N=3; AChR MG, N=9) for the presence of IgG-V<sup>N-Glyc</sup> (**Table S1**). Longitudinal samples were  
137 also included to evaluate the temporal stability of IgG-V<sup>N-Glyc</sup> patterns (**Table S1**). The IgG-V<sup>N-</sup>  
138 <sup>Glyc</sup> presence was tested through the assessment of immunoglobulin heavy chain migration  
139 patterns by SDS-PAGE. Serum-derived IgG from a patient with RA was included as a  
140 positive control (**Figure 2A**). IgG migration patterns between healthy individuals and MG  
141 patients were compared (**Figure 2B**); differences were noted for one AChR patient (AChR  
142 MG-1) and one MuSK patient (MuSK MG-1). Longitudinal samples were assessed spanning  
143 a period of four years of clinical disease; the altered migration patterns remained consistent  
144 through all of the time points collected from these two subjects (**Figure 2C**). These two  
145 subjects also demonstrated an elevated frequency of IgG-V<sup>N-glyc</sup> in their B cell repertoire  
146 (**Figure 1 arrows**).

147

148 To assess whether the altered migration patterns observed in MuSK MG-1 and AChR MG-1  
149 reflect elevated IgG glycosylation as opposed to other possible modifications such as  
150 phosphorylation or ubiquitination, IgG was subjected to digestion with PNGase F or Endo S.  
151 Enzymatic digestion of MuSK MG-1 IgG with PNGase F, which non-specifically cleaves N-  
152 linked glycosylation units, resulted in a loss of the atypical IgG migration pattern. By  
153 comparison, Endo S, which cleaves N-linked glycosylation at N297 of IgG constant region,  
154 caused a shift in gel mobility in both samples, but no change in the atypical pattern (**Figure**  
155 **2D**). Removal of phosphates with CIP, a phosphatase enzyme, also had no effect on  
156 migration (**Figure S3**). These results suggest that a subset of patients with MG possess  
157 atypical immunoglobulin glycosylation specifically in the Fab region, likely due to IgG-V<sup>N-Glyc</sup>,  
158 which appears to be a stable feature over long periods of time (3-4 years).

159

160 *MuSK and AChR human mAbs contain occupied IgG-V<sup>N-Glyc</sup> sites*

161 We had previously generated three human recombinant MuSK-specific mAbs that  
162 demonstrated *in vitro* pathogenic capacity (33, 35, 36). We found glycosylation motifs (N-X-  
163 S/T) in the variable region of all three MuSK mAbs, in either the heavy (MuSK1A and 3-28)  
164 or light chain (MuSK1B) (**Figure 3A-C**). Specifically, the motif was present in the heavy chain  
165 FWR3 of MuSK1A due to the use of IGHV1-8 where it is encoded in the germline. MuSK1B  
166 acquired the motif in the light chain (FWR1) through SHM, and the heavy chain lost the motif  
167 in the CDR2, which was present in the germline VH (IGHV4-34). MuSK3-28 acquired the  
168 motif in the heavy chain (CDR2) through SHM. We sought to test if these sites were occupied.  
169 Digestion with PNGase F reduced the MW of the heavy (MuSK1A and MuSK3-28) and light  
170 chain (MuSK2A) of the mAbs suggesting the presence of N-linked glycosylation on the  
171 antibodies (**Figure S4A-C**). We then removed these putative glycosylation sites by  
172 mutagenesis and screened all constructs for variations in migratory pattern due to MW  
173 changes. Removal of glycosylation sites led to a change in gel mobility as expected in all



174 three MuSK mAbs, which was also consistent with site-specific occupancy (**Figure S4D-F**).

175 Next, we performed intact mass spectrometry analysis to more precisely detect these

176 glycosylation sites (**Figure 3A-C**). Differences in mass and mass spectra can be used to

177 confirm the presence of IgG-V<sup>N-Glyc</sup>. All three MuSK autoantibodies were found to be

178 glycosylated and the mutated variants were significantly less heterogeneous and lighter in

179 mass by approximately 2 kDa (**Figure 3A-C**). Because N-glycans are extremely

180 heterogeneous molecular moieties, proteins containing IgG-V<sup>N-Glyc</sup> have elevated mass

181 spectra heterogeneity; these findings confirm the presence of glycosylation, and that

182 mutations were successful in disrupting the introduction of glycosylation in all three MuSK

183 mAbs.

184

185 Next, to extend these findings to AChR MG, we evaluated the patient-derived AChR-specific

186 mAb 637 (37) as its sequence shows two predicted N-linked glycosylation sites (N66 and

187 N84) within the variable region of the FR3 of heavy chain, which were acquired through SHM

188 (**Figure 3D**). The heavy chain of mAb 637 migrated at a lower MW when treated with

189 PNGase F in comparison to untreated mAb (**Figure S5A**). We subsequently performed

190 mutagenesis and produced several different constructs disrupting the two predicted

191 glycosylation sites—at N66 and N84. Mutation of N66 alone or N66 and N84 together

192 resulted in a construct that migrated at lower MW, while mutation of only the N84 did not

193 affect migration (**Figure S5B, C**). We further explored this result using intact mass

194 spectrometry analysis of the Fd from the WT and three mutants (**Figure 3D**). The WT

195 construct and the construct containing a mutation at position N84 had a complex mixture of

196 proteoforms clustered between 28.3 – 28.8 kDa, whereas constructs containing mutations at

197 N66 (including a mutant at both N66 and N84) were less heterogeneous, with proteoforms

198 clustering closer to 26.4 kDa (**Figure 3D**). The lighter mass and simplified proteoform

199 signature of variants containing a mutation at N66 suggests that N66 is the main site of

200 glycosylation in mAb 637 and not N84. Additionally, removal of the glycosylation site N66 did  
201 not shift glycosylation to the second predicted site at N84. In summary, autoantigen-specific  
202 mAbs in MG can contain occupied N-glycosylation of their IgG variable regions.

203

204 *N-linked glycosylation in the variable region does not impact MG autoantibody binding.*

205 We then sought to test the contribution of IgG-V<sup>N-Glyc</sup> to MuSK mAb binding. Given that these  
206 mAbs were previously validated for their capacity to bind AChR or MuSK in live cell-based  
207 assays (33, 35, 36), we tested the contribution of IgG-V<sup>N-Glyc</sup> sites to binding using the same  
208 approach (**Figure 4A-D**). When tested over a wide range of concentrations (10 – 0.02  
209 µg/mL), we found that loss of IgG-V<sup>N-Glyc</sup> did not affect binding of anti-MuSK or anti-AChR  
210 mAbs to cognate targets.

211

## 212 **Discussion**

213 Two mechanisms are thought to contribute to increased IgG-V<sup>N-Glyc</sup> frequency. The first is  
214 enriched usage, at the naïve B cell stage, of the five germline V gene segments that contain  
215 N-linked glycosylation motifs (IGHV1-8, IGHV4-34, IGHV5-10, IGVL3-12 and IGVL5-37). The  
216 second mechanism is selection, during affinity maturation, of B cell clones that acquire N-  
217 linked glycosylation motifs through the SHM process. The germline encoded motifs in the  
218 three heavy chains are found in CDR2 of IGHV4-34 and in the FWR3 of IGHV1-8 and  
219 IGHV5-10. Our sequence analysis showed that these motifs, when they are acquired, are  
220 distributed throughout the variable region with the exception of FWR2. The distribution  
221 mirrors SHM patterns in that mutations accumulate preferentially in CDRs and FWR3. While  
222 replacement mutations can be observed in FWR2, our data suggest that a glycosylation motif  
223 is not tolerated in this region, suggesting that such alterations are constrained by the role of  
224 the FWRs in conserving the overall structure of the antibody. Similarly, motifs found in FWR1  
225 and FWR4 were restricted to regions near the flexible CDR loops that they flank. These

226 collective findings indicate that the acquisition of the motif may be driven by positive  
227 selection. It is also possible that the motifs could be selectively neutral but arise as a  
228 consequence of SHM. If so, MG repertoires could have more motifs than the HD repertoires  
229 simply by having more SHM, and the motifs could be concentrated around the CDRs due to  
230 the presence of known hotspot motifs in those regions.

231

232 SHM appears to be a major contributor to the increased frequency of the IgG-V<sup>N-Glyc</sup> sites in  
233 the AChR MG patients we studied. Positive selection leading to enriched N-linked  
234 glycosylation DNA motifs has been observed in the parotid gland of patients with pSS, a  
235 structure known to contain ectopic lymphoid follicles in these patients (20). Similarly, the  
236 thymus in a subset of MG patients includes germinal centers, which are thought to contribute  
237 to the generation and maturation of AChR autoantibody producing B cells (38-40). Thus,  
238 positive selection of N-linked glycosylation DNA motifs may occur in this compartment, and  
239 support for this possibility is provided by a previous study where we found that the IgG-  
240 switched BCR sequences in MG thymus were enriched N-linked glycosylation DNA motifs  
241 (41).

242

243 Both V gene usage and the SHM process contributed to the elevated frequencies we  
244 observed in the MuSK MG patients. Defects in B cell tolerance checkpoints can skew the  
245 developing repertoire (42). Such defects are known to exist in both AChR and MuSK MG  
246 (43), and thus are likely to contribute to enrichment of the V genes containing N-linked  
247 glycosylation motifs we observed in some patients with MuSK MG. However, the  
248 accumulation of additional motifs through SHM suggests that, in the MuSK disease subtype,  
249 antigen-driven positive selection also plays a role in the conspicuously elevated IgG-V<sup>N-Glyc</sup>  
250 frequency. It remains possible that this selection is an antigen-independent process.  
251 Examples of this mechanism include interactions between glycosylated B cell receptors and

252 lectins (21), which are thought to drive proliferation in B cell malignancies and some  
253 autoimmune diseases (20). The antigen binding by the autoantibodies we studied was not  
254 disturbed by N-linked glycosylation. Additionally, human MuSK-binding mAbs that do not  
255 include glycosylation motifs have been isolated from MG patients (34). These results indicate  
256 that selection of the IgG-V<sup>N-Glyc</sup> in human MuSK autoantibodies may not have been driven by  
257 MG specific self-antigen positive selection. This is somewhat unexpected given that the IgG-  
258 V<sup>N-Glyc</sup> sites could be found in regions responsible for antigen contact (CDRs). Similarly, the  
259 variable regions of anti-citrullinated protein autoantibodies (ACPA) from patients with RA are  
260 consistently glycosylated, but their binding is not influenced by the modification (18).  
261 However, other investigations suggest that binding can be modulated as a consequence of  
262 their presence (5, 16, 17). These collective findings suggest that an autoantigen-independent  
263 selection mechanism may influence the IgG-V<sup>N-Glyc</sup> motif frequency in the autoimmune  
264 repertoire in some, but not all, autoimmune diseases.

265

266 Our proteomic analysis of the serum-derived IgG from only two of the study subjects (one  
267 from each of the AChR and MuSK MG cohorts) showed a higher molecular weight band in  
268 the electrophoresis studies. These findings indicate that the serum IgG repertoire may not be  
269 well reflected by the circulating IgG B cell repertoire that we sequenced, which has been  
270 previously suggested (44). Rather, these findings may reflect that much of the circulating IgG  
271 is derived from long-lived plasma cells residing in the bone marrow. Furthermore, other  
272 investigations (14, 16) that showed the presence of IgG-V<sup>N-Glyc</sup> by electrophoresis in human  
273 autoimmunity, focused on specifically enriched autoantibodies rather than total circulating  
274 IgG, which was the focus of our study.

275

276 One of two possible glycosylation sites in an autoantibody known to be specific for AChR,  
277 mAb 637, was shown to be unoccupied. We speculate that this is indicative of context

278 specific N-glycosylation (local amino acid sequence containing the motif or cellular  
279 environment) or inherent selectivity for one site over the other possibly due to conformation  
280 or solvent accessibility. Nevertheless, this site did not appear to contribute to binding activity,  
281 similar to our observations obtained by testing the MuSK mAbs. We recognize, as a study  
282 limitation, that the *in vitro* expression of these mAbs may not emulate the glycosylation  
283 occupancy *in vivo*. We did use a mammalian expression system (human embryonic kidney  
284 cells), to achieve the best approximation of the *in vivo* status, and we experimentally  
285 confirmed occupancy for the antigen binding studies. It remains to be investigated whether  
286 variables such as the stage of B cell activation or tissue residence could alter the occupancy.

287

288 Finally, a consensus on the function of IgG-V<sup>N-Glyc</sup> in health or disease is unclear. Several  
289 possibilities have been described, including perturbation of antibody-antigen interactions  
290 (binding affinity, specificity), altered metabolism of B cells or IgG *in vivo* (half-life, clearance),  
291 mis-localization of IgG to host tissue, redemption of autoreactive B cells, and inappropriate  
292 selection/expansion of autoreactive B cells in germinal centers (1, 2, 45). Elimination of these  
293 motifs or removal of the glycosyl moiety itself have been observed to impair antigen  
294 binding—such as in anti-adalimumab/infliximab antibodies derived from patients treated for  
295 RA (5). However other studies have suggested a more nuanced picture; a study of anti-CCP  
296 (cyclic citrullinated protein) autoantibodies showed no contribution of N-linked glycans to  
297 binding (18). Here we show unequivocal evidence that the presence of N-linked glycans is  
298 not required for binding in the case of four MG autoantibodies. This appears to agree with the  
299 majority of studies published regarding the role of IgG-V<sup>N-Glyc</sup> on antigen binding.

300

301 In summary, IgG-V<sup>N-Glyc</sup> is elevated in a subset of patients AChR and MuSK MG. These  
302 findings are consistent with those of a previous study (46) that showed elevated (albeit not  
303 statistically significant) V region N-glycosylation sites in the B cell repertoire of MG patients

304 compared to healthy controls. Our findings extend this molecular phenotype beyond RA,  
305 pSS, SLE, and AAV. IgG-V<sup>N-Glyc</sup> does not affect AChR or MuSK autoantibody binding. We  
306 speculate an elevation in N-linked glycosylation motifs containing V gene sequences may be  
307 driven by the presence of dysregulated germinal centers that contribute to B cell selection  
308 defects observed in the disease. Our findings contribute to efforts to understand the basic  
309 biology of IgG-V<sup>N-Glyc</sup> and its association with disease.

310

## 311 **Methods**

### 312 *Patient selection*

313 This study was approved by Yale University's Institutional Review Board (clinicaltrials.gov ||  
314 NCT03792659). Informed consent was received from all participating patients prior to  
315 inclusion in this study. Peripheral blood was collected from MG subjects at the Yale  
316 Myasthenia Gravis Clinic, New Haven, Connecticut, USA (47). Informed consent was  
317 received from all participating patients prior to inclusion in this study. A MuSK MG cohort  
318 (N=3) was defined using BCR repertoire sequencing derived from our previous study (48).  
319 Another n = 10 AChR MG and n = 9 healthy control subjects were selected for BCR based  
320 adaptive immune receptor repertoire-sequencing or AIRR-Seq using PBMC derived RNA for  
321 this study. In total, serum samples from all 3 MuSK MG subjects and 9 AChR MG subjects (8  
322 overlapping with paired AIRR-Seq) cohort were also investigated for the presence of VH  
323 gene glycosylation-specific signatures in the serum. With the exception of patient 4, AChR  
324 MG patients had not received any immunotherapy or prednisone prior to sample collection.  
325 For patients with MuSK MG diagnoses and patient AChR MG-1 with an AChR MG diagnosis,  
326 longitudinal serum samples were collected. A patient with Rheumatoid Arthritis (RA) (n = 1)  
327 was enrolled in a research study at University of California San Francisco (UCSF) for  
328 pathogen and autoantibody detection.

329

330 *Protein electrophoresis and immunoblotting*

331 For the initial screening processes patient sera samples were diluted 1:1 with 2X Storage  
332 Buffer (2X PBS, 20mM HEPES, 0.04% Sodium Azide, 20% Glycerol). The IgG from human  
333 sera or MuSK-specific mAb 4A3 and AChR-specific mAb 637 were captured with AG beads  
334 (Thermo Fisher) and then eluted by boiling at 95 degrees in 2X Laemmli buffer (with 10%  
335 beta-mercaptoethanol). For immunoblotting the gel was transferred to 0.45-micron  
336 nitrocellulose membrane and blotted with secondary anti-human IgG conjugated to IR800  
337 dye (LICOR, Cat). Nitrocellulose blots were imaged with LICOR scanner and analyzed  
338 qualitatively by eye for presence of altered migration patterns in IgG. Potential IgG heavy  
339 chain migration phenotypes were qualitatively called by an experimenter blind to  
340 experimental conditions. For the three MuSK-specific (mAb MuSK1A, MuSK1B and MuSK3-  
341 28) and AChR-specific mAb 637 Mini-PROTEAN® TGX Stain-Free™ Precast Gels (Biorad)  
342 and Laemmli Sample Buffer (Biorad) were used for SDS-page. Prior to electrophoresis the  
343 proteins were reduced with 0.1 M DTT (Thermo Fisher Scientific) and heat denatured at 95  
344 °C for 5 min. After electrophoresis the gel was stained with Coomassie blue solution. Bands  
345 were visualized with the ChemiDoc™ Touch Imaging System (Biorad). Enzymatic assays for  
346 PNGase F and Endo S were performed according to manufacturer's instructions (NEB). The  
347 effect of the enzymatic assays was either analyzed by Coomassie staining or  
348 immunoblotting.

349

350 *BCR library preparation, pre-processing and analysis*

351 First, RNA was isolated from frozen peripheral blood mononuclear cells using the RNeasy  
352 Mini kit (Qiagen) per manufacturer's instructions. Bulk libraries were prepared from RNA  
353 using reagents from New England Biolabs as part of the NEBNext® Immune Sequencing Kit  
354 as described previously (41, 42). Briefly, cDNA was reverse-transcribed by a template-switch  
355 reaction to add a 17-nucleotide unique molecular identifier (UMI) to the 5' end with

356 streptavidin magnetic bead purification. This was then followed by two rounds of PCR; the  
357 first round enriched for immunoglobulin sequences using IGHA, IGHD, IGHE, IGHG, and  
358 IGHM-specific 3' primers and added a 5' index primer. Libraries were purified with AMPure  
359 XP beads (Beckman) after which another round of PCR added Illumina P5 Adaptor  
360 sequences to each amplicon. The number of cycles selected based on quantitative PCR to  
361 avoid the plateau phase. Libraries were then purified again with AMPure beads. Libraries  
362 were pooled in equimolar libraries and sequenced by 325 cycles for read 1 and 275 cycles  
363 for read 2 using paired-end sequencing with a 20% PhiX spike on the Illumina MiSeq  
364 platform according to manufacturer's recommendations.

365

366 Processing and analysis of bulk B cell receptor sequences was carried out using tools from  
367 the Immcantation framework as done previously (49). Preprocessing was performed using  
368 pRESTO. Briefly, sequences with a phred score below 20 were removed and only those that  
369 contained constant region and template switch sequences were preserved. UMI sequences  
370 were then grouped and consensus sequences were constructed for each group and  
371 assembled into V(D)J sequences in a two-step process involving an analysis of overlapping  
372 sequences (<8 nucleotides) or alignment against the IMGT (the international  
373 ImMunoGeneTics information system®) IGHV reference (IMGT/GENE-DB v3.1.19; retrieved  
374 December 1, 2019) if no significant overlap was found. Isotypes were assigned by local  
375 alignment of the 3' end of the V(D)J sequence to constant region sequences. Duplicate  
376 sequences were removed and only V(D)J sequences reconstructed from more than 1  
377 amplicon were preserved. Primer sequences used for this analysis are available at:  
378 <https://bitbucket.org/kleinsteint/immcantation>.

379

380 V(D)J germline genes were assigned to reconstructed V(D)J sequences using IgBLAST  
381 v.1.14.0 also using the December 1, 2019 version of the IMGT gene database for both bulk



382 and single cell repertoires (50). V(D)J sequences with IGH associated V and J genes were  
383 then selected for further analysis and non-functional sequences were removed. Germline  
384 sequences were reconstructed for each V(D)J sequence with D segment and N/P regions  
385 masked (with Ns) using the CreateGermlines.py function within Change-O v1.0.0(51). VH  
386 gene nucleotides up to IMGT position 312 were translated from both the aligned sequence  
387 and germline reconstructed V(D)J sequence using BioPython v1.75. To quantify the  
388 frequency of N-X-S/T glycosylation motifs, matches to the regular expression pattern  
389 "N[^P][S,T]" were quantified for each translated sequence, including for translated CDR and  
390 FWR fragments of the VH gene sequence (defined by IMGT coordinates) (4). N-X-S/T  
391 glycosylation motifs in the CDR3 and FWR4 regions were similarly quantified separately and  
392 included for CDR and FWR distribution analyses.

393

394 To build the lineage tree in **Supplemental Figure 1**, B cells were first clustered into clones  
395 by partitioning based on common IGHV gene annotations, IGHJ gene annotations, and  
396 junction lengths. Within these groups, sequences differing from one another by a length  
397 normalized Hamming distance of 0.2 within the junction region were defined as clones by  
398 single-linkage clustering using Change-O v.1.0.1(51). The Hamming distance threshold was  
399 determined by manual inspection of the distance to the nearest sequence neighbor plot using  
400 SHazaM v1.0.2(52). Phylogenetic tree topology and branch lengths of an illustrative clonal  
401 lineage were estimated using the HLP19 model in IgPhyML v1.1.3 and visualized using  
402 ggtree v2.0.4 and custom R scripts(53, 54).

403

#### 404 *Mass Spectrometry*

405 High-resolution mass spectrometry (HRMS) was employed to confirm the change in  
406 glycosylation status between wild type and mutated variants. In order to reduce complexity at  
407 the intact mass level a "middle-down" approach was utilized (55, 56). Intact antibodies were

408 incubated with IdeS protease, followed by reduction of disulfide bonds. This workflow is well  
409 known to break down antibodies into three ~25 kDa subunits – LC, Fc, and Fd – and thereby  
410 separate disease-associated glycosylation within the variable region from standard  
411 glycosylation in the constant region. The heavy chain variable region (VH) is located within  
412 the Fd subunit. Purified mAb (2 mg/mL in PBS) was treated with 1 unit of IdeS protease  
413 (Promega) per 1 µg of mAb, and the sample was incubated at 37°C in a shaking incubator  
414 for 1.5 hours. The digested sample was then diluted into 6 M guanidinium chloride to a final  
415 IgG concentration of 1 mg/mL, and Tris(2-carboxyethyl) phosphine hydrochloride (TCEP-  
416 HCl) was added for a final concentration of 30 mM. The sample was incubated at 37°C in a  
417 shaking incubator for 1.5 hours, then the reaction was quenched by the addition of  
418 trifluoroacetic acid (final TFA concentration of 0.1% v/v). The sample was desalted by buffer  
419 exchange into LC-MS buffer (5 rounds of buffer exchange with an Amicon Ultra-0.5 mL  
420 centrifugal filter unit, 10 kDa MWCO).

421

422 The digested and reduced antibody species were further desalted and separated on a  
423 monolithic C4 column (RP-5H, 100 mm, 0.5 mm i.d., Thermo Scientific) with an Ultimate  
424 3000 RSLCnano system (Thermo Scientific) using a binary gradient. The gradient utilized  
425 solvent A: 95% water, 5% acetonitrile, and 0.2% formic acid, and solvent B: 5% water, 95%  
426 acetonitrile, and 0.2% formic acid.

427

428 Data were acquired on a Q Exactive HF instrument with an attached HESI source (sheath  
429 gas = 10, auxiliary gas = 2, spare gas = 2, spray voltage = 3500 V, S-lens RF level = 65).

430 MS1 acquisition used a scan range window of 400 to 2,000 m/z with 1 microscan and an  
431 AGC target of 1e6, at a resolution of 15,000.

432

433 *Site directed mutagenesis of glycosylation site*

434 Glycosylation sites (N-X-S/T) present in the V regions of the monoclonal antibodies were  
435 removed by mutating the asparagine (N) either to a glutamine (Q) or a serine (S). This was  
436 performed with Q5® Site-Directed Mutagenesis Kit (NEB) according to manufacturer's  
437 instructions. The primers were designed with NEBaseChanger. Sequences of all expression  
438 plasmids were verified by Sanger sequencing.

439

#### 440 *Recombinant expression of human monoclonal antibodies (mAbs)*

441 The mAbs were produced as previously described (Takata et al., 2019). Briefly, HEK293A  
442 cells were transfected with equal amounts of the heavy and the corresponding light chain  
443 plasmid using linear PEI (Polysciences Cat# 23966). The media was changed after 24 h to  
444 BASAL media (50% DMEM 12430, 50% RPMI 1640, 1% antibiotic/antimycotic, 1% Na-  
445 pyruvate, 1% Nutridoma). After 6 days the supernatant was harvested and Protein G  
446 Sepharose® 4 Fast Flow beads (GE Healthcare) were used for antibody purification.

447

#### 448 *Live cell-based autoantibody assay*

449 Cell-based assays for detection of AChR or MuSK antibody binding were performed as we  
450 have previously described(57). Briefly, the cDNA encoding human AChR  $\alpha$ ,  $\beta$ ,  $\delta$ ,  $\epsilon$ -subunits  
451 and rapsyn-GFP were each cloned into pcDNA3.1-hygro plasmid vectors (Invitrogen, CA)  
452 and cDNA encoding human full-length MuSK was cloned into pIRES2-EGFP plasmid vector  
453 (Clontech). AChR and MuSK vectors were kindly provided by Drs. D. Beeson and A. Vincent  
454 of the University of Oxford. HEK293T (ATCC® CRL3216™) cells were transfected with either  
455 MuSK-GFP, or the AChR domains together with rapsyn-GFP. On the day of the CBA, the  
456 mAbs were added to the transfected cells in a dilution series (10 – 0.02  $\mu$ g/ml). The binding  
457 of each mAb was detected with Alexa Fluor®-conjugated AffiniPure Rabbit Anti-Human IgG,  
458 Fcy (309-605-008, Jackson ImmunoResearch) on a BD LSRFortessa® (BD Biosciences).  
459 FlowJo software (FlowJo, LLC) was used for analysis.

460

#### 461 *Statistics*

462 R v4.0.3 was used for all statistical analysis. Data frame handling and plotting was performed  
463 using functions from the tidyverse v1.3.0 in R and pandas v0.24.2 in python v3.7.5. A  
464 significance threshold of  $<0.05$  was used and shown on plots with a single asterisk; double  
465 asterisks correspond to a  $p < 0.01$  and triple asterisks correspond to a  $p < 0.001$ . Unpaired  
466 one-tailed Wilcoxon tests were used for comparisons with healthy controls in repertoire  
467 analysis; the alternative hypothesis was that the average count of glycosylation motifs for  
468 each V(D)J sequence in MG BCR repertoires would be higher.

469

#### 470 **Disclosures**

471 KCO has received research support from Ra Pharma and is a consultant and equity  
472 shareholder of Cabaletta Bio. KCO is the recipient of a sponsored research subaward from  
473 the University of Pennsylvania, the primary financial sponsor of which is Cabaletta Bio. KCO  
474 has received speaking and advising fees from Alexion and Roche. MLF has received  
475 research support from Grifols. RJN has received research support from Genentech, Alexion  
476 Pharmaceuticals, argenx, Annexon Biosciences, Ra Pharmaceuticals, Momenta,  
477 Immunovant, and Grifols. RJN has served as consultant/advisor for Alexion Pharmaceuticals,  
478 argenx, CSL Behring, Grifols, Ra Pharmaceuticals, Immunovant, Momenta and Viela Bio.  
479 SHK receives consulting fees from Northrop Grumman. MRW has received research support  
480 from Roche/Genentech. KBH receives consulting fees from Prellis Biologics.

481

#### 482 **Funding support**

483 KCO is supported by the National Institute of Allergy and Infectious Diseases (NIAID) of the  
484 National Institutes of Health (NIH through awards R01-AI114780 and R21-AI142198, (NIH)  
485 through the Rare Diseases Clinical Research Consortia of the NIH (award number U54-

486 NS115054) and by a Neuromuscular Disease Research program award from the Muscular  
487 Dystrophy Association (MDA) under award number MDA575198. RJ is supported by the  
488 NIAID award number F31-AI154799. SHK is supported by the NIAID under award number  
489 R01-AI104739. MLF is a recipient of the James Hudson Brown — Alexander Brown Coxe  
490 Postdoctoral Fellowship in the Medical Sciences and the research of MLF has further been  
491 supported through a DFG Research fellowship (FI 2471/1-1). NLK acknowledges support  
492 from the National Institute of General Medical Sciences under award number P41 GM108569  
493 for the National Resource for Translational and Developmental Proteomics. CMB is funded  
494 by The Emiko Terasaki Foundation (Project 7027742 / Fund B73335) and by the National  
495 Institute of Neurological Disorders and Stroke (NINDS) of the National Institutes of Health  
496 (award 1K99NS117800-01). SEV is funded by the National Institute of Diabetes and  
497 Digestive and Kidney Diseases of the NIH (award 1F30DK123915-01). JDL is funded by a  
498 grant from Chan Zuckerberg Biohub. JDL, MRW and CMB are funded by the National  
499 Institute of Mental Health (NIMH) of the NIH (award 1R01MH122471-01).

500

## 501 **Acknowledgments**

502 The authors thank Karen Boss for expert copy editing and proofreading, Dr. Bailey Munro-  
503 Sheldon for verifying autoantibody titers, and Charlotte A. Gurley for assisting with  
504 manuscript and reference formatting.

## Figures and legends

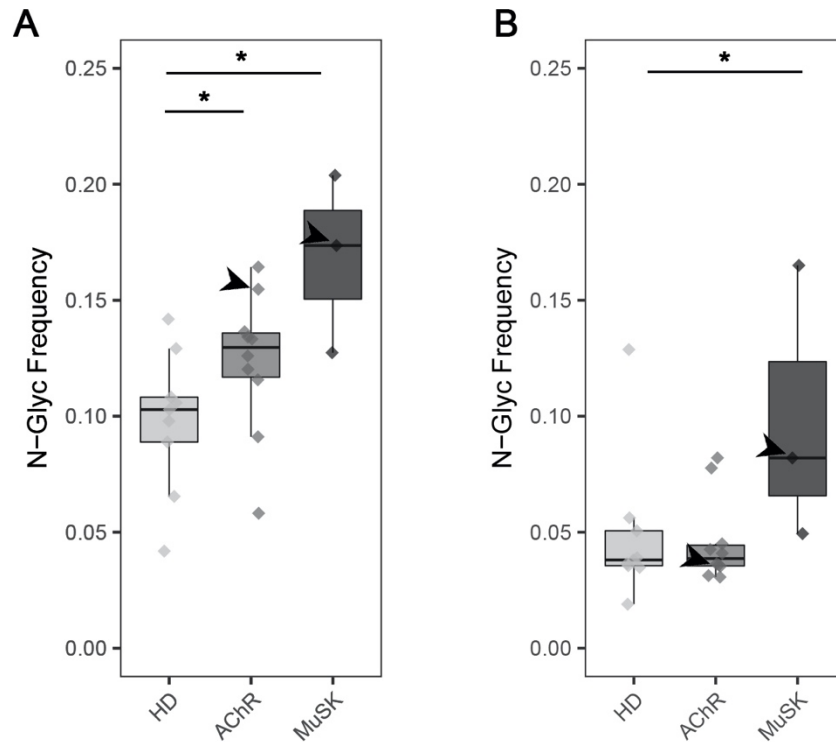

**Figure 1. Frequency of IgG isotype-specific V<sup>N-Glyc</sup> sites in the B cell receptor repertoire.** Analysis of adaptive immune receptor repertoire sequencing showing the frequency of N-linked glycosylation motifs in AChR and MuSK MG BCR repertoires relative to HDs. (A) Frequency of N-linked glycosylation motifs (N-X-S/T) in the V gene sequence repertoire derived from healthy, AChR and MuSK MG patient repertoires is shown. (B) Frequency of N-linked glycosylation motifs (N-X-S/T, average number of sites per V(D)J sequence) in germline reverted V gene sequences from BCR repertoire derived from healthy, AChR and MuSK MG patient repertoires. A significance threshold of  $p < 0.05$  was used and shown on plots with a single asterisk. Arrows point to AChR MG-1 or MuSK MG-1 depending on the boxplot in (A) and (B).

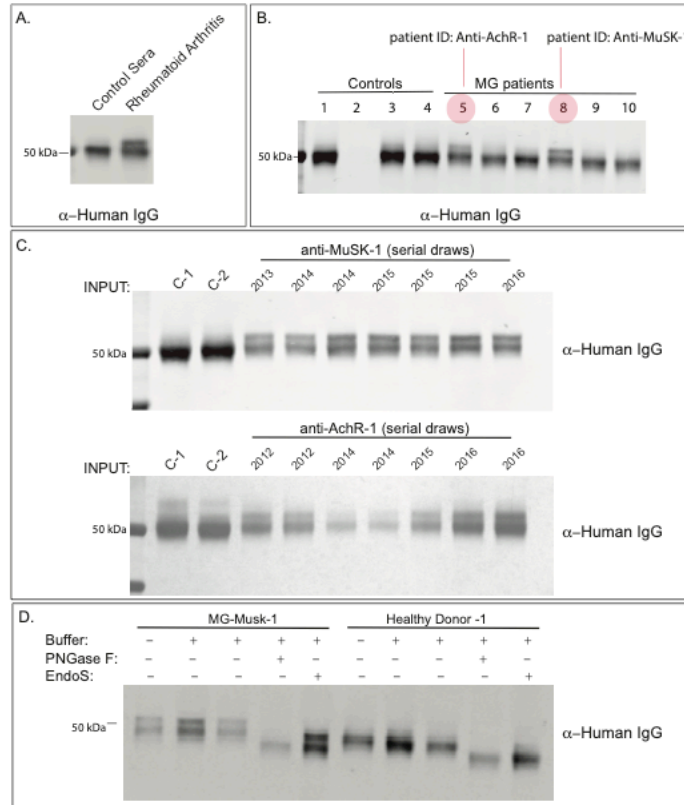

**Figure 2. Proteomic analysis of glycosylation of serum IgG.** Screen reveals evidence of elevated Fab N-linked glycosylation in myasthenia gravis. Serum IgG heavy chain migratory patterns from SDS-PAGE and immunoblotting with anti-human secondary are shown for sub-panels. (A) Serum IgG heavy chain migration pattern from non-inflammatory control and a patient with RA shown by immunoblot. (B) Serum IgG heavy chain migration patterns for non-inflammatory controls (Lane 1, 3, 4), A/G beads only (No antibody, Lane 2) and clinically confirmed AChR MG (Lanes 5, 6, 7) or MuSK MG (Lanes 8, 9, 10) shown by immunoblot. Lane 5 corresponds to subject AChR MG-1 and lane 8 corresponds to subject MuSK MG-1. (C) Longitudinal serum IgG heavy chain patterns from subjects MuSK MG-1 and AChR MG-1 shown by immunoblot. (D) Enzymatic validation of N-linked glycosylation shown by immunoblot. Schematic of N-glycan cleavage specificity by PNGase F and Endo S for IgG. Endo S only cleaves N-glycans at N297; PNGase F cannot cleave N-linked glycans at N297. Treatment with PNGase F but not Endo S results in loss of migration phenotype. RA = Rheumatoid Arthritis. Input = 10% of total immunoprecipitated antibody using A/G beads from 1 ul of patient sera.

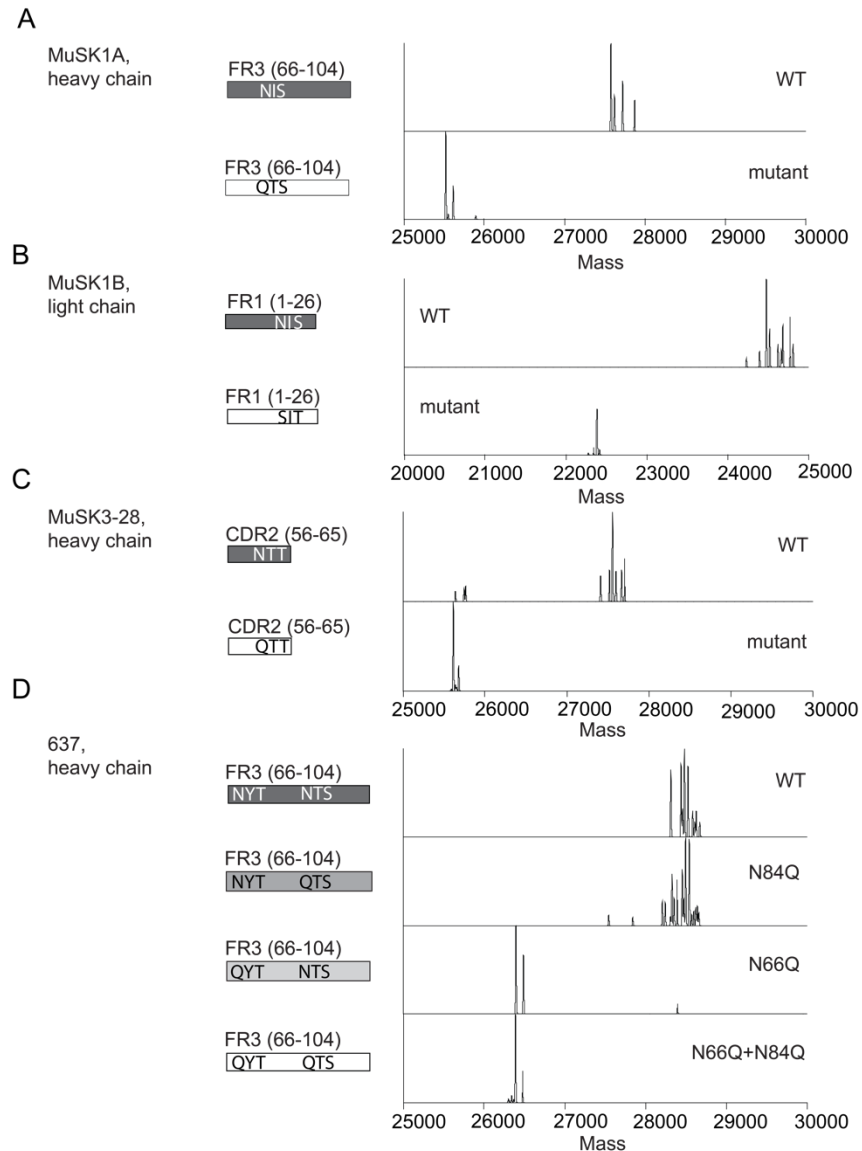

**Figure 3. Mass spectrometry analysis of N-glycan occupancy in MuSK-specific human monoclonal antibodies.** Validation of N-glycan occupancy in three patient-derived monoclonal anti-MuSK antibodies (MUSK1A, MUSK1B, MUSK3-28) and one patient-derived monoclonal anti-AChR antibody (monoclonal antibody 637). Schematic of variable regions for anti-MuSK antibodies indicating regions (CDR or FWR) and localization of putative N-linked glycosylation amino acid motifs alongside deconvoluted mass spectra of the associated constructs (labels). This is shown for MUSK1A (A), MUSK1B (B), MUSK3-28 (C) and mAb 637 (D).



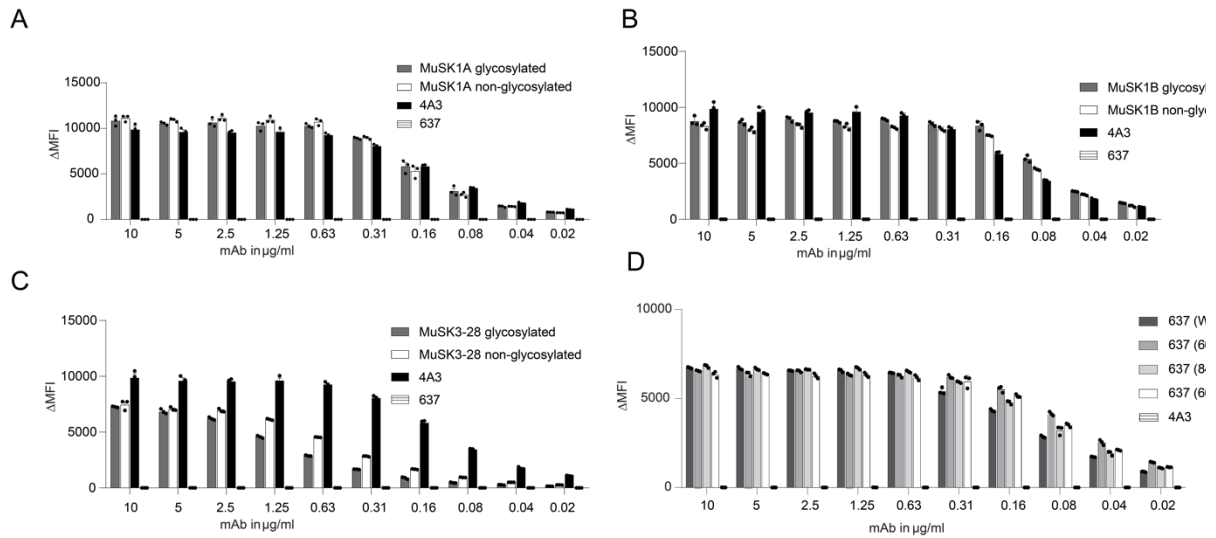

**Figure 4. The effect of glycosylation on MuSK and AChR-specific monoclonal antibody binding properties.** Antigen binding of MuSK and AChR-specific monoclonal antibodies is not affected by the presence of glycosylation sites. Wildtype MuSK and AChR mAbs and their glycovariants were tested for surface binding to MuSK or AChR on MuSK-GFP-transfected or AChR-subunit-Rapsyn-GFP-transfected HEK293T cells. (A-C) All mAb variants were analyzed in a ten two-fold dilutions series for binding to MuSK by cell-based assay (CBA). Humanized MuSK mAb 4A3 was used as the positive control and AChR-specific mAb-04 as the negative control. MuSK1A (A), MuSK1B (B) and MuSK3-28 (C) were tested. (D) All 637 mAb variants were analyzed in a ten two-fold dilutions series for binding to AChR by CBA. Humanized MuSK mAb 4A3 was used as the negative control. Each data point represents the mean value from three independent experiments, and error bars represent SDs. The  $\Delta$ MFI was calculated by subtracting the signal from non-transfected cells from the signal of transfected cells.



A.

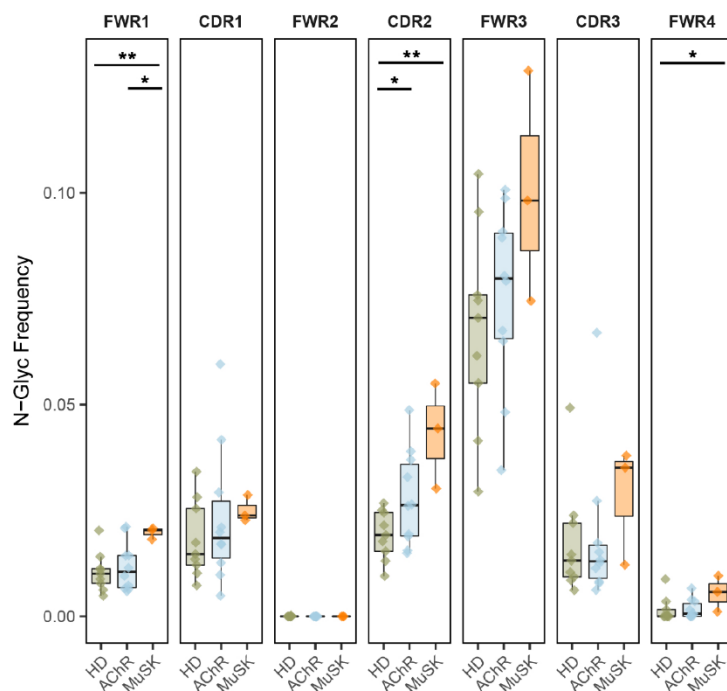

B.

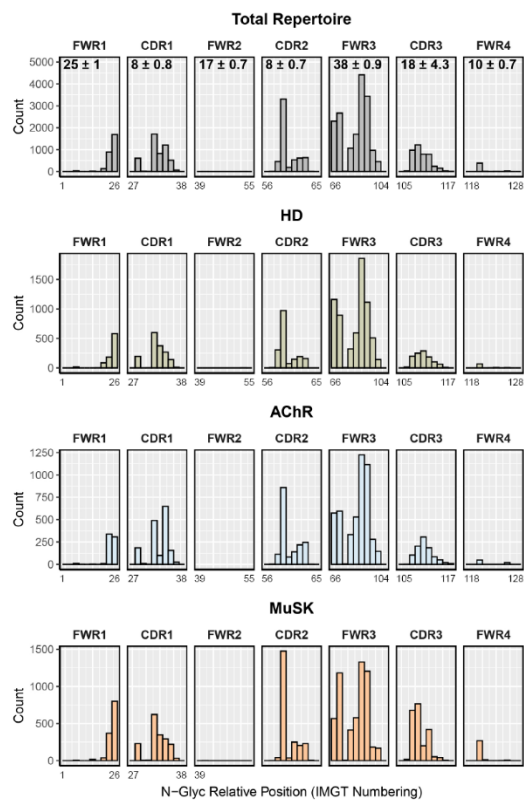

**Supplemental Figure 2. Distribution of IgG isotype-specific V<sup>N-Glyc</sup> sites in the BCR.** B cell receptor sequence analysis showing elevated frequency of N-linked glycosylation motifs in HD, AChR MG and MuSK MG repertoires across CDRs and FWRs (**A**). Frequency of N-linked glycosylation motifs (N-X-S/T, average number of sites per V(D)J sequence) in each V gene region of IgG sequences is shown. Title over each panel specifies the region that was searched. A significance threshold of  $p < 0.05$  was used and shown on plots with a single asterisk; double asterisks correspond to a  $p < 0.01$ . Histogram (**B**) showing positional distribution of N-linked glycosylation motifs within the FWRs and CDRs. The average length (AA) and standard deviation of each region is indicated in the panels on the top row.

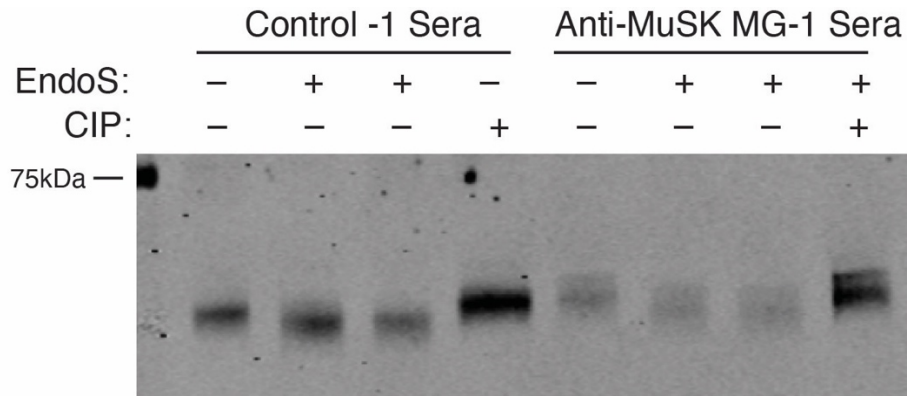

**Supplemental Figure 3. Additional enzymatic digestions of MG serum-derived IgG to deduce the molecular basis of altered heavy chain migration pattern.** Treatment of IgG with Endoglycosidase (EndoS) or Calf intestinal phosphates CIP had no effect on migration as indicated by presence of double band in all conditions in MG. EndoS cleaves the chitobiose core of N-linked glycans, leaving the primary N-acetylglucosamine linked to Asparagine. CIP catalyzes dephosphorylation.

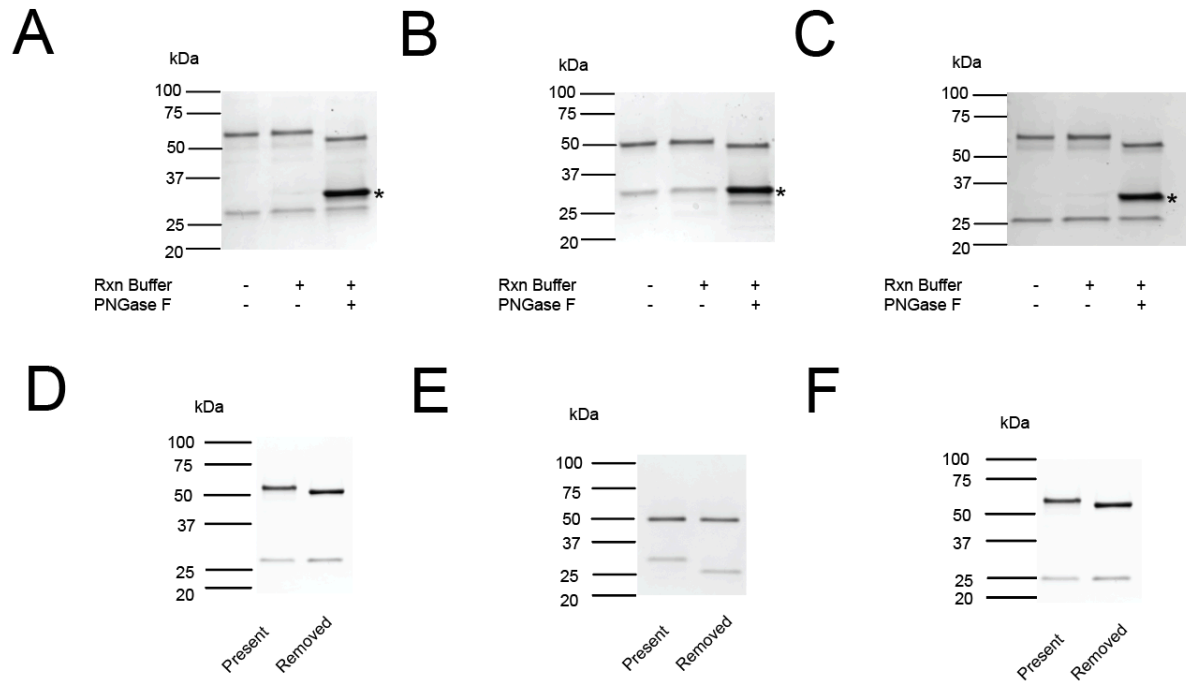

**Supplemental Figure 4. IgG migration patterns of heavy and light chains from wildtype mAbs following removal of N-glycans.** MuSK1A (A), MuSK1B (B) and MuSK3-28 (C) were treated with the enzyme PNGase F as indicated. Subsequently, the proteins were separated by SDS-PAGE and detected by Coomassie staining. Asterisk marks PNGase F enzyme (A-C). (D-F) All three mature MuSK mAb contained glycosylation motifs. The motifs were removed through mutagenesis and the proteins tested by Coomassie staining for consecutive change of molecular weight (MW). Present corresponds to the WT construct while Removed refers to the construct with the N-glycan site mutated (D-F).

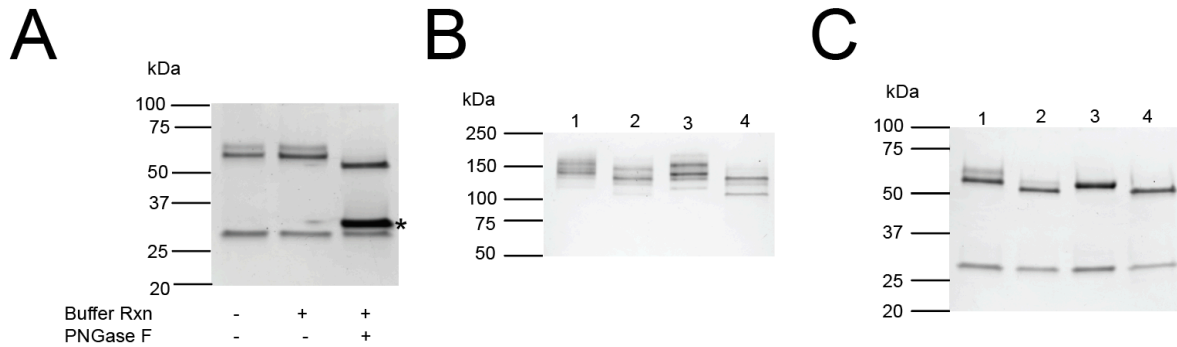

**Supplemental Figure 5. Proteomic analysis of glycosylation for AChR-specific mAb**

**637.** (A) The mAb 637 was treated with the enzyme PNGase F as indicated. Subsequently, the proteins were separated by SDS-PAGE and detected by Coomassie staining. (B) (C) The generated knockout constructs were tested by Coomassie staining for consecutive change of molecular weight (MW). The constructs were either loaded untreated (B) or reduced by DTT and boiled at 95°C for 5 min (C). Asterisk marks PNGase F enzyme in (A). In (B) and (C), the lanes correspond to the following: Lane 1: 637 (WT); Lane 2: 637 (66Q); Lane 3: 637 (84Q); Lane 4: 637 (66Q+84Q).

| Sample name | Myasthenia gravis subtype | Time point in months (serial samples) | Antibody Titer | Screening for serum IgG glycosylation | AIRR Sequencing |
|-------------|---------------------------|---------------------------------------|----------------|---------------------------------------|-----------------|
| MuSK MG-1   | MuSK                      | 0                                     | 2560           | —                                     | ✓               |
| MuSK MG-1   | MuSK                      | 17                                    | 2560           | ✓                                     | —               |
| MuSK MG-1   | MuSK                      | 19                                    | 640            | ✓                                     | —               |
| MuSK MG-1   | MuSK                      | 26                                    | 80             | ✓                                     | —               |
| MuSK MG-1   | MuSK                      | 31                                    | 2560           | ✓                                     | ✓               |
| MuSK MG-1   | MuSK                      | 36                                    | 2560           | ✓                                     | ✓               |
| MuSK MG-1   | MuSK                      | 39                                    | 5120           | ✓                                     | ✓               |
| MuSK MG-1   | MuSK                      | 44                                    | 2.5 nmol/L*    | ✓                                     | —               |
| MuSK MG-1   | MuSK                      | 50                                    | 1.65 nmol/L*   | ✓                                     | —               |
| MuSK MG-2   | MuSK                      | 0                                     | 2560           | ✓                                     | ✓               |
| MuSK MG-2   | MuSK                      | 6                                     | 2560           | —                                     | ✓               |
| MuSK MG-2   | MuSK                      | 56                                    | not tested     | ✓                                     | ✓               |
| MuSK MG-2   | MuSK                      | 61                                    | 40             | ✓                                     | —               |
| MuSK MG-2   | MuSK                      | 76                                    | 5.7 nmol/L*    | ✓                                     | ✓               |
| MuSK MG-3   | MuSK                      | 0                                     | <10            | ✓                                     | ✓               |
| MuSK MG-3   | MuSK                      | 1                                     | <10            | ✓                                     | ✓               |
| MuSK MG-3   | MuSK                      | 10                                    | 10             | ✓                                     | ✓               |
| MuSK MG-3   | MuSK                      | 25                                    | not tested     | ✓                                     | ✓               |
| AChR MG-1   | AChR                      | 0                                     | 4.15 nmol/L*   | ✓                                     | —               |
| AChR MG-1   | AChR                      | 4                                     | 9.19 nmol/L*   | ✓                                     | ✓               |
| AChR MG-1   | AChR                      | 24                                    | 0.48 nmol/L*   | ✓                                     | —               |
| AChR MG-1   | AChR                      | 28                                    | 0.64 nmol/L*   | ✓                                     | —               |
| AChR MG-1   | AChR                      | 43                                    | 0.97 nmol/L*   | ✓                                     | —               |
| AChR MG-1   | AChR                      | 48                                    | 2.37 nmol/L*   | ✓                                     | —               |
| AChR MG-1   | AChR                      | 54                                    | 3.28 nmol/L*   | ✓                                     | —               |
| AChR MG-2   | AChR                      |                                       | 2.54 nmol/L*   | ✓                                     | ✓               |
| AChR MG-3   | AChR                      |                                       | 13.5 nmol/L*   | ✓                                     | ✓               |
| AChR MG-4   | AChR                      |                                       | 0.24 nmol/L*   | ✓                                     | ✓               |
| AChR MG-5   | AChR                      | 0                                     | 44.8 nmol/L*   | ✓                                     | ✓               |
| AChR MG-5   | AChR                      | 1                                     | 3.31 nmol/L*   | ✓                                     | —               |
| AChR MG-6   | AChR                      | 0                                     | 143 nmol/L*    | ✓                                     | ✓               |
| AChR MG-6   | AChR                      | 3                                     | not tested     | ✓                                     | —               |
| AChR MG-7   | AChR                      |                                       | 35.7 nmol/L*   | ✓                                     | —               |
| AChR MG-8   | AChR                      |                                       | 3.35 nmol/L*   | ✓                                     | ✓               |
| AChR MG 9   | AChR                      | 0                                     | 0.2 nmol/L*    | ✓                                     | ✓               |
| AChR MG -9  | AChR                      | 4                                     | 0.02 nmol/L*   | ✓                                     | —               |
| AChR MG-11  | AChR                      |                                       | 15.8 nmol/L*   | —                                     | ✓               |



|            |                 |              |   |   |
|------------|-----------------|--------------|---|---|
| AChR MG-12 | AChR            | 0.43 nmol/L* | — | ✓ |
| HD-1       | Healthy control | not tested   | — | ✓ |
| HD-2       | Healthy control | not tested   | — | ✓ |
| HD-3       | Healthy control | not tested   | — | ✓ |
| HD-4       | Healthy control | not tested   | — | ✓ |
| HD-5       | Healthy control | not tested   | — | ✓ |
| HD-6       | Healthy control | not tested   | — | ✓ |
| HD-7       | Healthy control | not tested   | — | ✓ |
| HD-8       | Healthy control | not tested   | — | ✓ |
| HD-9       | Healthy control | not tested   | — | ✓ |

---

### **Supplemental Table 1. Characteristics and analysis status of study subjects.**

Myasthenia gravis subtype, time points of collected serial samples and subtype-specific autoantibody titer/concentration of each study specimen. The reference range for positivity varies according to the measuring facility. For samples measured by Athena Diagnostics the titer range is negative for <1:10, borderline for 1:10 and positive for >1:20. The cut off for negativity for samples measured at Mayo Clinic Laboratory is  $\leq 0.02$  nmol/L. Samples measured at Mayo Clinic Laboratory are indicated by an (\*). Analysis status for serum IgG glycosylation or AIRR sequencing data is indicated by ( ✓ ) for available and ( — ) for not performed. The time point 0 of each serial sample is normalized to indicate the first sample in the series.

## References

1. van de Bovenkamp, F. S., L. Hafkenscheid, T. Rispens, and Y. Rombouts. 2016. The Emerging Importance of IgG Fab Glycosylation in Immunity. *J Immunol* 196: 1435-1441.
2. Kanyavuz, A., A. Marey-Jarossay, S. Lacroix-Desmazes, and J. D. Dimitrov. 2019. Breaking the law: unconventional strategies for antibody diversification. *Nat Rev Immunol* 19: 355-368.
3. Dunn-Walters, D., L. Boursier, and J. Spencer. 2000. Effect of somatic hypermutation on potential N-glycosylation sites in human immunoglobulin heavy chain variable regions. *Mol Immunol* 37: 107-113.
4. Lefranc, M. P. 2001. IMGT, the international ImMunoGeneTics database. *Nucleic Acids Res* 29: 207-209.
5. van de Bovenkamp, F. S., N. I. L. Derksen, P. Ooijevaar-de Heer, K. A. van Schie, S. Kruihof, M. A. Berkowska, C. E. van der Schoot, I. J. H. M. van der Burg, A. Gils, L. Hafkenscheid, R. E. M. Toes, Y. Rombouts, R. Plomp, M. Wuhrer, S. M. van Ham, G. Vidarsson, and T. Rispens. 2018. Adaptive antibody diversification through N-linked glycosylation of the immunoglobulin variable region. *Proc Natl Acad Sci U S A* 115: 1901-1906.
6. Zhu, D., H. McCarthy, C. H. Ottensmeier, P. Johnson, T. J. Hamblin, and F. K. Stevenson. 2002. Acquisition of potential N-glycosylation sites in the immunoglobulin variable region by somatic mutation is a distinctive feature of follicular lymphoma. *Blood* 99: 2562-2568.
7. Radcliffe, C. M., J. N. Arnold, D. M. Suter, M. R. Wormald, D. J. Harvey, L. Royle, Y. Mimura, Y. Kimura, R. B. Sim, S. Inoges, M. Rodriguez-Calvillo, N. Zabalegui, A. L. de Cerio, K. N. Potter, C. I. Mockridge, R. A. Dwek, M. Bendandi, P. M. Rudd, and F. K. Stevenson. 2007. Human follicular lymphoma cells contain oligomannose glycans in the antigen-binding site of the B-cell receptor. *J Biol Chem* 282: 7405-7415.
8. Odabashian, M., E. Carlotti, S. Araf, J. Okosun, F. Spada, J. G. Gribben, F. Forconi, F. K. Stevenson, M. Calaminici, and S. Krysov. 2020. IGHV sequencing reveals acquired N-glycosylation sites as a clonal and stable event during follicular lymphoma evolution. *Blood* 135: 834-844.
9. Koning, M. T., E. Quinten, W. H. Zoutman, S. M. Kielbasa, H. Mei, C. A. M. van Bergen, P. Jansen, R. D. Vergroesen, R. Willemze, M. H. Vermeer, C. P. Tensen, and H. Veelken. 2019. Acquired N-Linked Glycosylation Motifs in B-Cell Receptors of

- Primary Cutaneous B-Cell Lymphoma and the Normal B-Cell Repertoire. *J Invest Dermatol* 139: 2195-2203.
10. Zabalegui, N., A. L. de Cerio, S. Inoges, M. Rodriguez-Calvillo, J. Perez-Calvo, M. Hernandez, J. Garcia-Foncillas, S. Martin-Algarra, E. Rocha, and M. Bendandi. 2004. Acquired potential N-glycosylation sites within the tumor-specific immunoglobulin heavy chains of B-cell malignancies. *Haematologica* 89: 541-546.
  11. Visser, A., N. Hamza, F. G. M. Kroese, and N. A. Bos. 2018. Acquiring new N-glycosylation sites in variable regions of immunoglobulin genes by somatic hypermutation is a common feature of autoimmune diseases. *Ann Rheum Dis* 77: e69.
  12. Holland, M., H. Yagi, N. Takahashi, K. Kato, C. O. Savage, D. M. Goodall, and R. Jefferis. 2006. Differential glycosylation of polyclonal IgG, IgG-Fc and IgG-Fab isolated from the sera of patients with ANCA-associated systemic vasculitis. *Biochim Biophys Acta* 1760: 669-677.
  13. Xu, P. C., S. J. Gou, X. W. Yang, Z. Cui, X. Y. Jia, M. Chen, and M. H. Zhao. 2012. Influence of variable domain glycosylation on anti-neutrophil cytoplasmic autoantibodies and anti-glomerular basement membrane autoantibodies. *BMC Immunol* 13: 10.
  14. Lardinois, O. M., L. J. Deterding, J. J. Hess, C. J. Poulton, C. D. Henderson, J. C. Jennette, P. H. Nachman, and R. J. Falk. 2019. Immunoglobulins G from patients with ANCA-associated vasculitis are atypically glycosylated in both the Fc and Fab regions and the relation to disease activity. *PLoS One* 14: e0213215.
  15. Youngs, A., S. C. Chang, R. A. Dwek, and I. G. Scragg. 1996. Site-specific glycosylation of human immunoglobulin G is altered in four rheumatoid arthritis patients. *Biochem J* 314 ( Pt 2): 621-630.
  16. Rombouts, Y., A. Willemze, J. J. van Beers, J. Shi, P. F. Kerkman, L. van Toorn, G. M. Janssen, A. Zaldumbide, R. C. Hoeben, G. J. Pruijn, A. M. Deelder, G. Wolbink, T. Rispen, P. A. van Veelen, T. W. Huizinga, M. Wuhler, L. A. Trouw, H. U. Scherer, and R. E. Toes. 2016. Extensive glycosylation of ACPA-IgG variable domains modulates binding to citrullinated antigens in rheumatoid arthritis. *Ann Rheum Dis* 75: 578-585.
  17. Hafkenscheid, L., A. Bondt, H. U. Scherer, T. W. Huizinga, M. Wuhler, R. E. Toes, and Y. Rombouts. 2017. Structural Analysis of Variable Domain Glycosylation of Anti-

- Citrullinated Protein Antibodies in Rheumatoid Arthritis Reveals the Presence of Highly Sialylated Glycans. *Mol Cell Proteomics* 16: 278-287.
18. Lloyd, K. A., J. Steen, K. Amara, P. J. Titcombe, L. Israelsson, S. L. Lundstrom, D. Zhou, R. A. Zubarev, E. Reed, L. Piccoli, C. Gabay, A. Lanzavecchia, D. Baeten, K. Lundberg, D. L. Mueller, L. Klareskog, V. Malmstrom, and C. Gronwall. 2018. Variable domain N-linked glycosylation and negative surface charge are key features of monoclonal ACPA: Implications for B-cell selection. *Eur J Immunol* 48: 1030-1045.
  19. Visser, A., M. E. Doorenspleet, N. de Vries, F. K. L. Spijkervet, A. Vissink, R. J. Bende, H. Bootsma, F. G. M. Kroese, and N. A. Bos. 2018. Acquisition of N-Glycosylation Sites in Immunoglobulin Heavy Chain Genes During Local Expansion in Parotid Salivary Glands of Primary Sjogren Patients. *Front Immunol* 9: 491.
  20. Hamza, N., U. Hershberg, C. G. Kallenberg, A. Vissink, F. K. Spijkervet, H. Bootsma, F. G. Kroese, and N. A. Bos. 2015. Ig gene analysis reveals altered selective pressures on Ig-producing cells in parotid glands of primary Sjogren's syndrome patients. *J Immunol* 194: 514-521.
  21. Coelho, V., S. Krysov, A. M. Ghaemmaghami, M. Emara, K. N. Potter, P. Johnson, G. Packham, L. Martinez-Pomares, and F. K. Stevenson. 2010. Glycosylation of surface Ig creates a functional bridge between human follicular lymphoma and microenvironmental lectins. *Proc Natl Acad Sci U S A* 107: 18587-18592.
  22. Gilhus, N. E., G. O. Skeie, F. Romi, K. Lazaridis, P. Zisimopoulou, and S. Tzartos. 2016. Myasthenia gravis - autoantibody characteristics and their implications for therapy. *Nat Rev Neurol* 12: 259-268.
  23. Vincent, A. 2002. Unravelling the pathogenesis of myasthenia gravis. *Nat Rev Immunol* 2: 797-804.
  24. Yi, J. S., J. T. Guptill, P. Stathopoulos, R. J. Nowak, and K. C. O'Connor. 2018. B cells in the pathophysiology of myasthenia gravis. *Muscle & nerve* 57: 172-184.
  25. Hoch, W., J. McConville, S. Helms, J. Newsom-Davis, A. Melms, and A. Vincent. 2001. Auto-antibodies to the receptor tyrosine kinase MuSK in patients with myasthenia gravis without acetylcholine receptor antibodies. *Nat Med* 7: 365-368.
  26. McConville, J., M. E. Farrugia, D. Beeson, U. Kishore, R. Metcalfe, J. Newsom-Davis, and A. Vincent. 2004. Detection and characterization of MuSK antibodies in seronegative myasthenia gravis. *Ann Neurol* 55: 580-584.

27. Fichtner, M. L., R. Jiang, A. Bourke, R. J. Nowak, and K. C. O'Connor. 2020. Autoimmune Pathology in Myasthenia Gravis Disease Subtypes Is Governed by Divergent Mechanisms of Immunopathology. *Front Immunol* 11: 776.
28. Drachman, D. B., R. N. Adams, L. F. Josifek, and S. G. Self. 1982. Functional activities of autoantibodies to acetylcholine receptors and the clinical severity of myasthenia gravis. *N Engl J Med* 307: 769-775.
29. Drachman, D. B., C. W. Angus, R. N. Adams, J. D. Michelson, and G. J. Hoffman. 1978. Myasthenic antibodies cross-link acetylcholine receptors to accelerate degradation. *N Engl J Med* 298: 1116-1122.
30. Sterz, R., R. Hohlfeld, K. Rajki, M. Kaul, K. Heininger, K. Peper, and K. V. Toyka. 1986. Effector mechanisms in myasthenia gravis: end-plate function after passive transfer of IgG, Fab, and F(ab')<sub>2</sub> hybrid molecules. *Muscle Nerve* 9: 306-312.
31. Howard, F. M., Jr., V. A. Lennon, J. Finley, J. Matsumoto, and L. R. Elveback. 1987. Clinical correlations of antibodies that bind, block, or modulate human acetylcholine receptors in myasthenia gravis. *Ann N Y Acad Sci* 505: 526-538.
32. Koneczny, I., J. Cossins, P. Waters, D. Beeson, and A. Vincent. 2013. MuSK myasthenia gravis IgG4 disrupts the interaction of LRP4 with MuSK but both IgG4 and IgG1-3 can disperse preformed agrin-independent AChR clusters. *PLoS One* 8: e80695.
33. Takata, K., P. Stathopoulos, M. Cao, M. Mane-Damas, M. L. Fichtner, E. S. Benotti, L. Jacobson, P. Waters, S. R. Irani, P. Martinez-Martinez, D. Beeson, M. Losen, A. Vincent, R. J. Nowak, and K. C. O'Connor. 2019. Characterization of pathogenic monoclonal autoantibodies derived from muscle-specific kinase myasthenia gravis patients. *JCI Insight* 4.
34. Huijbers, M. G., D. L. Vergoossen, Y. E. Fillie-Grijpma, I. E. van Es, M. T. Koning, L. M. Slot, H. Veelken, J. J. Plomp, S. M. van der Maarel, and J. J. Verschuuren. 2019. MuSK myasthenia gravis monoclonal antibodies: Valency dictates pathogenicity. *Neurol Neuroimmunol Neuroinflamm* 6: e547.
35. Stathopoulos, P., A. Kumar, R. J. Nowak, and K. C. O'Connor. 2017. Autoantibody-producing plasmablasts after B cell depletion identified in muscle-specific kinase myasthenia gravis. *JCI Insight* 2.
36. Fichtner, M. L., C. Vieni, R. L. Redler, L. Kolich, R. Jiang, K. Takata, P. Stathopoulos, P. A. Suarez, R. J. Nowak, S. J. Burden, D. C. Ekiert, and K. C. O'Connor. 2020.

- Affinity maturation is required for pathogenic monovalent IgG4 autoantibody development in myasthenia gravis. *J Exp Med* 217.
37. Graus, Y. F., M. H. de Baets, P. W. Parren, S. Berrih-Aknin, J. Wokke, P. J. van Breda Vriesman, and D. R. Burton. 1997. Human anti-nicotinic acetylcholine receptor recombinant Fab fragments isolated from thymus-derived phage display libraries from myasthenia gravis patients reflect predominant specificities in serum and block the action of pathogenic serum antibodies. *J Immunol* 158: 1919-1929.
  38. Cron, M. A., S. Maillard, J. Villegas, F. Truffault, M. Sudres, N. Dragin, S. Berrih-Aknin, and R. Le Panse. 2018. Thymus involvement in early-onset myasthenia gravis. *Ann N Y Acad Sci* 1412: 137-145.
  39. Weis, C. A., B. Schalke, P. Strobel, and A. Marx. 2018. Challenging the current model of early-onset myasthenia gravis pathogenesis in the light of the MGTX trial and histological heterogeneity of thymectomy specimens. *Ann N Y Acad Sci* 1413: 82-91.
  40. Marx, A., F. Pfister, B. Schalke, G. Saruhan-Direskeneli, A. Melms, and P. Strobel. 2013. The different roles of the thymus in the pathogenesis of the various myasthenia gravis subtypes. *Autoimmun Rev* 12: 875-884.
  41. Jiang, R., K. B. Hoehn, C. S. Lee, M. C. Pham, R. J. Homer, F. C. Detterbeck, I. Aban, L. Jacobson, A. Vincent, R. J. Nowak, H. J. Kaminski, S. H. Kleinstein, and K. C. O'Connor. 2020. Thymus-derived B cell clones persist in the circulation after thymectomy in myasthenia gravis. *Proc Natl Acad Sci U S A* 117: 30649-30660.
  42. Vander Heiden, J. A., P. Stathopoulos, J. Q. Zhou, L. Chen, T. J. Gilbert, C. R. Bolen, R. J. Barohn, M. M. Dimachkie, E. Ciafaloni, T. J. Broering, F. Vigneault, R. J. Nowak, S. H. Kleinstein, and K. C. O'Connor. 2017. Dysregulation of B Cell Repertoire Formation in Myasthenia Gravis Patients Revealed through Deep Sequencing. *J Immunol* 198: 1460-1473.
  43. Lee, J. Y., P. Stathopoulos, S. Gupta, J. M. Bannock, R. J. Barohn, E. Cotzomi, M. M. Dimachkie, L. Jacobson, C. S. Lee, H. Morbach, L. Querol, J. L. Shan, J. A. Vander Heiden, P. Waters, A. Vincent, R. J. Nowak, and K. C. O'Connor. 2016. Compromised fidelity of B-cell tolerance checkpoints in AChR and MuSK myasthenia gravis. *Ann Clin Transl Neurol* 3: 443-454.
  44. Chen, J., Q. Zheng, C. M. Hammers, C. T. Ellebrecht, E. M. Mukherjee, H. Y. Tang, C. Lin, H. Yuan, M. Pan, J. Langenhan, L. Komorowski, D. L. Siegel, A. S. Payne, and J. R. Stanley. 2017. Proteomic Analysis of Pemphigus Autoantibodies Indicates a

- Larger, More Diverse, and More Dynamic Repertoire than Determined by B Cell Genetics. *Cell Rep* 18: 237-247.
45. Sabouri, Z., P. Schofield, K. Horikawa, E. Spierings, D. Kipling, K. L. Randall, D. Langley, B. Roome, R. Vazquez-Lombardi, R. Rouet, J. Hermes, T. D. Chan, R. Brink, D. K. Dunn-Walters, D. Christ, and C. C. Goodnow. 2014. Redemption of autoantibodies on anergic B cells by variable-region glycosylation and mutation away from self-reactivity. *Proc Natl Acad Sci U S A* 111: E2567-2575.
  46. Koers, J., N. I. L. Derksen, P. Ooijevaar-de Heer, B. Nota, F. S. van de Bovenkamp, G. Vidarsson, and T. Rispens. 2019. Biased N-Glycosylation Site Distribution and Acquisition across the Antibody V Region during B Cell Maturation. *J Immunol* 202: 2220-2228.
  47. Anil, R., A. Kumar, S. Alaparathi, A. Sharma, J. L. Nye, B. Roy, K. C. O'Connor, and R. J. Nowak. 2020. Exploring outcomes and characteristics of myasthenia gravis: Rationale, aims and design of registry - The EXPLORE-MG registry. *J Neurol Sci* 414: 116830.
  48. Jiang, R., M. L. Fichtner, K. B. Hoehn, M. C. Pham, P. Stathopoulos, R. J. Nowak, S. H. Kleinstein, and K. C. O'Connor. 2020. Single-cell repertoire tracing identifies rituximab-resistant B cells during myasthenia gravis relapses. *JCI Insight* 5.
  49. Gupta, N. T., K. D. Adams, A. W. Briggs, S. C. Timberlake, F. Vigneault, and S. H. Kleinstein. 2017. Hierarchical Clustering Can Identify B Cell Clones with High Confidence in Ig Repertoire Sequencing Data. *J Immunol* 198: 2489-2499.
  50. Ye, J., N. Ma, T. L. Madden, and J. M. Ostell. 2013. IgBLAST: an immunoglobulin variable domain sequence analysis tool. *Nucleic Acids Res* 41: W34-40.
  51. Gupta, N. T., J. A. Vander Heiden, M. Uduman, D. Gadala-Maria, G. Yaari, and S. H. Kleinstein. 2015. Change-O: a toolkit for analyzing large-scale B cell immunoglobulin repertoire sequencing data. *Bioinformatics* 31: 3356-3358.
  52. Yaari, G., J. A. Vander Heiden, M. Uduman, D. Gadala-Maria, N. Gupta, J. N. Stern, K. C. O'Connor, D. A. Hafler, U. Laserson, F. Vigneault, and S. H. Kleinstein. 2013. Models of somatic hypermutation targeting and substitution based on synonymous mutations from high-throughput immunoglobulin sequencing data. *Front Immunol* 4: 358.
  53. Hoehn, K. B., J. A. Vander Heiden, J. Q. Zhou, G. Lunter, O. G. Pybus, and S. H. Kleinstein. 2019. Repertoire-wide phylogenetic models of B cell molecular evolution

- reveal evolutionary signatures of aging and vaccination. *Proc Natl Acad Sci U S A* 116: 22664-22672.
54. Yu, G., T. T. Lam, H. Zhu, and Y. Guan. 2018. Two Methods for Mapping and Visualizing Associated Data on Phylogeny Using Ggtree. *Mol Biol Evol* 35: 3041-3043.
55. Srzentic, K., L. Fornelli, Y. O. Tsybin, J. A. Loo, H. Seckler, J. N. Agar, L. C. Anderson, D. L. Bai, A. Beck, J. S. Brodbelt, Y. E. M. van der Burgt, J. Chamot-Rooke, S. Chatterjee, Y. Chen, D. J. Clarke, P. O. Danis, J. K. Diedrich, R. A. D'Ippolito, M. Dupre, N. Gasilova, Y. Ge, Y. A. Goo, D. R. Goodlett, S. Greer, K. F. Haselmann, L. He, C. L. Hendrickson, J. D. Hinkle, M. V. Holt, S. Hughes, D. F. Hunt, N. L. Kelleher, A. N. Kozhinov, Z. Lin, C. Malosse, A. G. Marshall, L. Menin, R. J. Millikin, K. O. Nagomov, S. Nicolardi, L. Pasa-Tolic, S. Pengelley, N. R. Quebbemann, A. Resemann, W. Sandoval, R. Sarin, N. D. Schmitt, J. Shabanowitz, J. B. Shaw, M. R. Shortreed, L. M. Smith, F. Sobott, D. Suckau, T. Toby, C. R. Weisbrod, N. C. Wildburger, J. R. Yates, 3rd, S. H. Yoon, N. L. Young, and M. Zhou. 2020. Interlaboratory Study for Characterizing Monoclonal Antibodies by Top-Down and Middle-Down Mass Spectrometry. *J Am Soc Mass Spectrom* 31: 1783-1802.
56. Fornelli, L., K. Srzentic, R. Huguet, C. Mullen, S. Sharma, V. Zabrouskov, R. T. Fellers, K. R. Durbin, P. D. Compton, and N. L. Kelleher. 2018. Accurate Sequence Analysis of a Monoclonal Antibody by Top-Down and Middle-Down Orbitrap Mass Spectrometry Applying Multiple Ion Activation Techniques. *Anal Chem* 90: 8421-8429.
57. Stathopoulos, P., A. Chastre, P. Waters, S. Irani, M. L. Fichtner, E. S. Benotti, J. M. Guthridge, J. Seifert, R. J. Nowak, J. H. Buckner, V. M. Holers, J. A. James, D. A. Hafler, and K. C. O'Connor. 2019. Autoantibodies against Neurologic Antigens in Nonneurologic Autoimmunity. *J Immunol* 202: 2210-2219.
